RESEARCH ARTICLE

# Relationship between Research Outcomes and Risk of Bias, Study Sponsorship, and Author Financial Conflicts of Interest in Reviews of the Effects of Artificially Sweetened Beverages on Weight Outcomes: A Systematic Review of Reviews

Daniele Mandrioli<sup>1,2\*</sup>, Cristin E Kearns<sup>3,4</sup>, Lisa A. Bero<sup>5</sup>

**1** Cesare Maltoni Cancer Research Center, Ramazzini Institute, Bentivoglio, Bologna, Italy, **2** Johns Hopkins Bloomberg School of Public Health, Baltimore, Maryland, United States of America, **3** Philip R. Lee Institute for Health Policy Studies, University of California San Francisco, San Francisco, California, United States of America, **4** Department of Orofacial Sciences, School of Dentistry, University of California San Francisco, San Francisco, California, United States of America, **5** Charles Perkins Centre and Faculty of Pharmacy, University of Sydney, Sydney, New South Wales, Australia

\* [mandriolid@ramazzini.it](mailto:mandriolid@ramazzini.it)

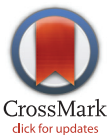

OPEN ACCESS

**Citation:** Mandrioli D, Kearns CE, Bero LA (2016) Relationship between Research Outcomes and Risk of Bias, Study Sponsorship, and Author Financial Conflicts of Interest in Reviews of the Effects of Artificially Sweetened Beverages on Weight Outcomes: A Systematic Review of Reviews. PLoS ONE 11(9): e0162198. doi:10.1371/journal.pone.0162198

**Editor:** Dermot Cox, Royal College of Surgeons in Ireland, IRELAND

**Received:** April 11, 2016

**Accepted:** August 18, 2016

**Published:** September 8, 2016

**Copyright:** © 2016 Mandrioli et al. This is an open access article distributed under the terms of the [Creative Commons Attribution License](https://creativecommons.org/licenses/by/4.0/), which permits unrestricted use, distribution, and reproduction in any medium, provided the original author and source are credited.

**Data Availability Statement:** All relevant data are within the paper and its Supporting Information files

**Funding:** The authors received no specific funding for this work.

**Competing Interests:** The authors have declared that no competing interests exist.

## Abstract

### Background

Artificially sweetened beverage consumption has steadily increased in the last 40 years. Several reviews examining the effects of artificially sweetened beverages on weight outcomes have discrepancies in their results and conclusions.

### Objectives

To determine whether risk of bias, results, and conclusions of reviews of effects of artificially sweetened beverage consumption on weight outcomes differ depending on review sponsorship and authors' financial conflicts of interest.

### Methods

We performed a systematic review of reviews of the effects of artificially sweetened beverages on weight. Two assessors independently screened articles for inclusion, extracted data, and assessed risks of bias. We compared risk of bias, results and conclusions of reviews by different industry sponsors, authors' financial conflict of interest and journal sponsor. We also report the concordance between review results and conclusions.

### Results

Artificial sweetener industry sponsored reviews were more likely to have favorable results (3/4) than non-industry sponsored reviews (1/23), RR: 17.25 (95% CI: 2.34 to 127.29), as

well as favorable conclusions (4/4 vs. 15/23), RR: 1.52 (95% CI: 1.14 to 2.06). All reviews funded by competitor industries reported unfavorable conclusions (4/4). In 42% of the reviews (13/31), authors' financial conflicts of interest were not disclosed. Reviews performed by authors that had a financial conflict of interest with the food industry (disclosed in the article or not) were more likely to have favorable conclusions (18/22) than reviews performed by authors without conflicts of interest (4/9), RR: 7.36 (95% CI: 1.15 to 47.22). Risk of bias was similar and high in most of the reviews.

## Conclusions

Review sponsorship and authors' financial conflicts of interest introduced bias affecting the outcomes of reviews of artificially sweetened beverage effects on weight that could not be explained by other sources of bias.

## Introduction

The global obesity epidemic represents one of the biggest public health challenges of our time: there are currently 600 million adults and 42 million children that are obese [1]. Overweight and obesity are associated with increased risk for a variety of chronic and debilitating diseases including cancer, cardiovascular disease and diabetes [2]. Once considered a problem only in high-income countries, overweight and obesity are now dramatically on the rise in low- and middle-income countries. People, particularly women, with less education and lower socio-economic status are more likely to be obese [3].

While no single factor is responsible for the recent increases in overweight and obesity, excess calories and inadequate physical activity are known determinants [4]. Added sugars are a significant source of excess calories and sugar-sweetened beverages are one of the main sources of added sugars, with an estimated 184 000 annual deaths attributable to their consumption worldwide [5, 6]. Multiple agencies have recommended daily limits for added sugars [7–9], as well as limitations on sugar sweetened beverage consumption [10].

Evidence of the adverse effects of added sugars on weight gain and obesity has fueled a debate about whether they should be replaced by artificial sweeteners [11]. Artificially sweetened beverage consumption, considered the main source of artificial sweeteners in the diet, has dramatically increased in the last 40 years in children and adults [12–17]. However, the replacement of added sugars with artificial sweeteners to prevent and control obesity is controversial, due to safety concerns [18–20] and conflicting evidence on their effect on weight [7, 21, 22]. Some studies have shown that artificial sweeteners may negatively affect the gut microbiome and pathways associated with diabetes mellitus or obesity in both rodents and humans [23–25]. Reverse causality has been proposed as a possible explanation for the discrepancies in the evaluation of the effects on weight of artificially sweetened beverages, since individuals at higher risk for weight gain may choose to consume artificially sweetened beverages in an attempt to control their weight [26]. Some authors suggest that artificially sweetened beverage consumption could lead to caloric compensation [27], while others suggest that satiety levels do not differ between people consuming different sweeteners [28].

Another possible explanation for the conflicting results of studies of artificially sweetened beverages may be bias related to funding source. Industry sponsorship of both original research and review articles is associated with favorable outcomes for the sponsor in a variety of areas

including clinical drug trials [29, 30], studies of the health effects of tobacco [31, 32], medical procedures [33, 34] and pre-clinical animal studies [35, 36]. The observed bias related to funding is not explained by other risks of bias in the studies (for example sequence generation, concealment of allocation, or loss to follow-up). In addition, bias may be related to funding source even when all studies are industry-funded. For example, among industry-sponsored head-to-head comparisons of statin drugs, the results favor the statin made by the company that sponsored the study [37].

Developers of public health guidelines have been adopting systematic review methods and more structured methods for grading recommendations; assessing bias in the reviews is a critical step in the process [7, 38, 39]. The food and beverage industry frequently sponsors research on the health effects of added sugars consumption and has produced reviews for policy purposes. For example, the cane and beet sugar industry has lobbied public health organizations, such as the World Health Organization, and produced reviews critical of the role of sugar in dental caries, overweight and obesity, and atherosclerotic vascular disease [40, 41]. Reviews of the health effects of sugar sweetened beverages that are performed by authors with financial ties to food companies are five times more likely to conclude that there is no association of sugar consumption with weight gain compared to those with other sponsors (relative risk: 5.0, 95% CI: 1.3–19.3)[42].

Low-calorie and caloric sweetener industries sponsor studies and reviews of the health effects of artificially sweetened beverages. There is some evidence of funding bias in original research studies. Walton has reported that among a sample of studies of aspartame, 100% of the industry sponsored studies concluded that aspartame was safe, and 92% of the independently funded studies identified adverse effects of aspartame consumption [43]. Millstone observed that in a recent re-evaluation of aspartame safety by the European Food Safety Authority, 97% of the studies that reported no harm were industry sponsored, while 100% of the studies indicating possible harms were non-industry sponsored [44]. The relationship of funding source and other biases to the outcomes of reviews of the effects of artificially sweetened beverages on weight outcomes has not been evaluated.

The objectives of this systematic review are to determine whether risk of bias, results, and conclusions of reviews of the effects of artificially sweetened beverage consumption on weight outcomes differ depending on 1) sources of review sponsorship and 2) authors' financial conflicts of interest.

Our *a priori* hypothesis is that review sponsorship and authors' financial conflicts of interest will be associated with results and conclusions that favor the sponsor's product, and that risk of bias will not differ by sponsor or author financial conflicts of interest.

## Methods

The selection criteria for reviews, data extraction and analyses were determined *a priori* to data collection. This research was exempt from Institutional Review Board approval as all the data were publically available.

## Inclusion / Exclusion Criteria for Reviews

We included published reviews that included human research studies comparing one or more artificially sweetened beverages to water, sugar sweetened beverages or mixed comparisons where the effects on weight were evaluated as a primary or secondary outcomes through BMI score or other measures of overweight and obesity. Overweight is defined as BMI > 25 kg/m<sup>2</sup> and obesity as BMI > 30 kg/m<sup>2</sup>.

An article was included if its stated or implied purpose was to review the scientific evidence on the effects of artificially sweetened beverage consumption on weight.

We included reviews that summarized data either quantitatively (with meta-analysis) or qualitatively (without meta-analysis).

Reviews of studies on beverages containing artificial sweeteners currently listed as Generally Recognized As Safe (GRAS) by the Food and Drug Administration [45] were included: acesulfame potassium (E950), aspartame (E951), salt of aspartame-acesulfame (E962), neotame (E961), saccharin (E954), sucralose (E955).

Reviews on studies of beverages containing artificial sweeteners previously approved, but currently not listed, as Generally Recognized As Safe (GRAS) by FDA were also included: sodium cyclamate, (E952, banned by FDA in 1969, currently in use in UK, EU and other countries), dulcin (banned by FDA in 1950), P-4000 (banned by FDA in 1950).

We only included reviews where full text was available in English; however, no non-English papers met the inclusion criteria.

A review was excluded if it assessed only the relationship between artificially sweetened beverage consumption and health effects other than weight outcomes such as cardiovascular disease, satiety, diabetes or cancer. We excluded reviews where the artificial sweeteners studied were only consumed in forms other than beverages. Only papers published in full were included; we excluded letters to the editor, editorials and published conference presentations.

## Search Methods for Identification Of Reviews

**Electronic searches.** We searched the following databases: Pubmed (1946–2014), Embase (1947–2014), Scopus (1823–2014), Web of Science (1840–2014), Sociological Abstracts (1952–2014). Data last updated: 22 August 2014.

**Search strategy.** We developed the search strategy with the assistance of a university librarian. We used the strategy shown in [S1 Appendix](#) for Pubmed and adapted it for the other databases.

**Searching other resources.** We also searched author files, reference lists of included papers and previous systematic reviews.

**Selection of studies.** Two assessors (DM, CK) screened the titles and abstracts, when available, of all retrieved records for obvious exclusions, and assessed the full text of the remaining papers. Potentially eligible papers were sent to another assessor for final validation of the inclusion criteria. Any disagreement was resolved by consensus (DM, CK, LB). Details are reported in the “PRISMA Flow Chart” ([Fig 1](#)).

## Data Collection and Analysis

Two assessors (DM, CK) independently extracted data from included reviews on 1) review characteristics, 2) review outcomes, 3) risk of bias of the review 4) primary outcomes for this analysis: a) favorable results and b) favorable conclusions 5) review funding sources, 6) authors’ financial conflicts of interests, and 7) journal characteristics. Discrepancies were resolved by discussion with a third coder (LB). Unresolved discrepancies were coded as unclear. Data extracted and assessors evaluations for each review are reported in [S2 Appendix](#).

## Review characteristics

- Artificial sweetener(s) studied
- Comparison group (s)

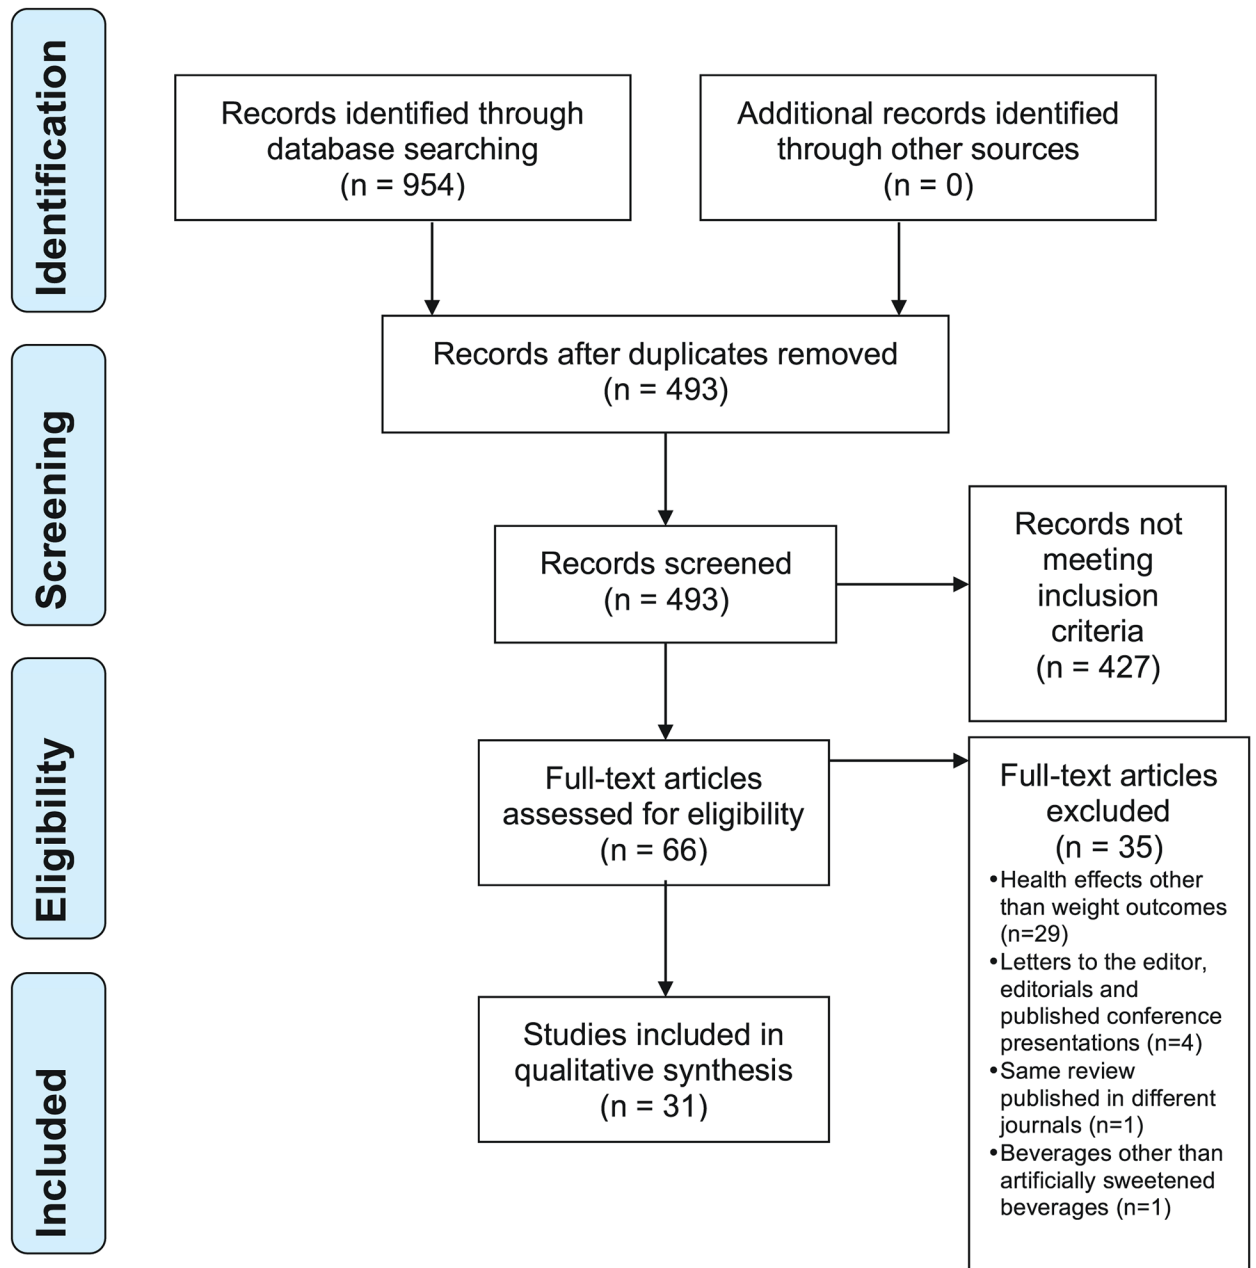

**Fig 1. Prisma Flow Diagram**

doi:10.1371/journal.pone.0162198.g001

- Time period covered by studies included in the review
- Number of studies included in the review (if given, or number of articles if provided)
- Population studied (healthy adults; non healthy adults; children)
- Review included meta-analysis (yes/ no)

## Review outcomes

- Weight outcomes assessed (BMI; other measure of weight gain; other measure of obesity)
- Adverse outcomes assessed (diabetes; hypertension)

Weight and adverse outcomes were extracted only if specified by the authors in the text of the review.

## Risk of bias

To assess risk of bias in the included reviews, we used the criteria used for Cochrane reviews on funding bias[46]:

- whether explicit and “well defined” criteria that could be replicated by others were used to select studies for inclusion/exclusion in the review (yes/no/unclear)
- whether there was an adequate study inclusion method, with two or more assessors selecting studies (yes/no/unclear)
- whether the search for studies was comprehensive (yes/no/unclear)
- whether methodological differences and other characteristics that could introduce bias were controlled (yes/no/unclear)

Overall risk of bias was coded as 1) “low” if at least three of the four criteria were met. In any other case risk of bias was coded as 2) “high.”

## Primary Outcomes for this Analysis

- Results (favorable/unfavorable)

First, results were extracted separately for each population studied (healthy adults; non healthy adults; children) in each review and coded as “positive” or “negative.”

For each population results were defined as:

- a. Positive: if more than 50 percent of the studies considered in the review reported that artificially sweetened beverage consumption in a population was associated with: a) statistically significant lower BMI score, overweight or obesity rate or no change compared to water; b) statistically significant lower BMI score, overweight or obesity rate compared to sugar-sweetened or other caloric beverages.
- b. Negative: if more than 50 percent of the studies considered in the review reported that artificially sweetened beverage consumption in a population was associated with: a) statistically significant higher BMI score, overweight or obesity rate when compared to water; b) statistically significant higher BMI score, overweight or obesity rate or no change compared to sugar-sweetened or other caloric beverages.
- c. Mixed: if the studies included in the review: a) did not report the results or 2) more than 50% of the studies did not fit the definition of “positive” or “negative”.

Second, the overall review results were coded as “favorable” or “unfavorable”. Overall results were defined as:

1. Favorable: if only positive results were reported for all the study populations considered in the review

2. Unfavorable: if “negative” or “mixed” results were reported within one or more populations considered in the review. Mixed results were considered to be unfavorable based on the public health perspective which suggests that an exposure is unfavorable even if only one subpopulation is affected.
- Conclusions (favorable/unfavorable)  
Conclusions were defined as:
    1. Favorable: if authors stated or implied in their conclusions that a) artificially sweetened beverage consumption was definitely or probably associated with decreased weight, BMI, or obesity or no change, b) artificially sweetened beverages consumption was associated with increased weight, BMI, or obesity, but the association was attributed to poor study design or bias, or c) the evidence was inconclusive. Articles concluding that the evidence was inconclusive were classified as favorable because this conclusion is consistent with an acceptance of the null hypothesis that there is no relationship between artificially sweetened beverage consumption and increased BMI score, overweight or obesity rate.
    2. Unfavorable: if the authors stated or implied in their conclusions that artificially sweetened beverages were definitely or probably associated with increased weight, BMI or obesity.

## Review funding source

- Names of disclosed funding sources
- Type(s) of funding source disclosed were coded as 1) food industry (subcategories: artificial sweetener industry, cane and beet sugar industry, other food industry), 2) government, 3) private non-profit, 4) other, or 5) no funding disclosed.  
Organizations that could not be clearly classified into the above categories were coded based on the main funding sources for the organization, determined through a Google search.
- For reviews with a disclosed industry funder, the role of the funding source was coded as 1) not stated, 2) sponsor not involved, or 3) sponsor involved.

## Authors' financial conflicts of interest

- Authors' names
- Number of authors
- Number of authors with a financial conflict of interest (disclosed in the paper or not)
- Number of authors without a financial conflict of interest

Financial conflicts of interest of the review authors were coded as 1) yes, disclosed in the paper, 2) yes, not disclosed in the paper, 3) no disclosure statement, and 4) no financial conflicts of interest.

Financial conflicts of interest were defined per the July 2010 version of the International Committee of Medical Journal Editors [47] uniform disclosure form for potential conflicts of interest and included: current or former board membership, current or former consultancy work, current or former industry employment, expert testimony, industry grants (issued or pending), payment for lectures including service on speakers bureaus, payment for manuscript

preparation, patents (planned, pending, or issued), royalties, payment for development of educational presentations, stock or stock options, and travel reimbursement, or other relations with relevant industries. For this study, relevant industries were defined as the food and beverage industry including trade groups and organizations such as the International Life Sciences Institute (ILSI).

We used a modification of a previous method to identify undisclosed financial conflicts of interest of authors [48]. For reviews where the authors did not provide a financial disclosure (“no disclosure statement”) or disclosed no financial conflict of interest (“no financial conflict of interest”), we searched the name of the authors in the European Food Safety Authority declaration of interests database, Center for Science in the Public Interest database, disclosures in other articles identified in Pubmed, Google, acknowledgments in other articles gathered for this study and their Curriculum Vitae. If a relevant conflict of interest was discovered using this search strategy, the search was discontinued and the author was classified as having a financial conflict of interest (“yes, not disclosed in the paper”).

## Journal characteristics

- Title
- Year and month published
- Journal name
- Peer-reviewed (yes/no)
- Journal funding (food industry/ mixed/ non-food industry)

Journal funding was defined as:

1. Food industry: if the journal or the scientific society associated with the journal was directly funded by the food and beverage industry, including trade groups and organizations such as the ILSI.
2. Mixed: if the journal or associated scientific society disclosed any funding or relationship (for example serving as press office or providing communication services other than advertising to companies) with the food industry.
3. Non-food industry: in any other case.

## Analysis

**Primary analyses.** 1) We compared risk of bias and the number of favorable results and conclusions in reviews with artificial sweetener industry sponsorship to those with other sources of sponsorship. We hypothesized that reviews sponsored by the artificial sweetener industry would be more likely to have high risk of bias and results and conclusions that favored the artificial sweetener industry compared to reviews sponsored by other sources.

We conducted an *a priori* subgroup analysis comparing risk of bias, results and conclusions of reviews with different industry sponsors (for example, cane and beet sugar industry sponsored reviews vs artificial sweetener industry sponsored reviews).

2) We compared risk of bias, results and conclusions of reviews that had one or more authors with financial conflicts of interests to reviews that had authors with none. We hypothesized that reviews that had authors with financial conflicts of interest would be more likely to



have high risk of bias and results and conclusions that favored the artificial sweetener industry compared to reviews that had authors with no financial conflicts of interest.

**Secondary analyses.** 1) We also report the concordance between review results and conclusions as previous research has shown that industry sponsored studies are less likely to have results and conclusions that agree compared to non-industry sponsored studies [30]. We hypothesized that industry sponsorship and authors' financial conflicts of interest would be associated with discordant results and conclusions (with results unfavorable toward artificially sweetened beverages and conclusions favorable toward artificially sweetened beverages).

2) We compared risk of bias, results and conclusions of reviews published in industry sponsored journals with those published in non-industry sponsored journals. We hypothesized that reviews published in industry sponsored journals would be more likely to have high risk of bias and results and conclusions that favored the artificial sweetener industry compared to reviews published in other journals.

**Sensitivity analyses.** Reviews with no disclosed funding sources may have been funded by industry. Therefore, we performed a sensitivity analysis excluding the reviews with no funding disclosed from the non-industry sponsored group.

**Statistical analysis.** Risk Ratios (RR) were calculated for all primary and secondary analyses with 95% confidence intervals (CI). Four reviews conducted meta-analyses, but we were unable to extract quantitative effect estimates that could be combined into a pooled effect size because of the different study designs and populations considered.

## Results

### Search results

After removal of duplicates, 493 references were identified and 31 reviews were included following full text screening (Fig 1, PRISMA Flow Diagram).

### Review characteristics

The 31 reviews were published between 1978 and 2014. Table 1 shows review characteristics by review funding source. Four reviews were funded by the artificial sweetener industry (ILSI, Ajinomoto Company, International Sweetener Association). Four were funded by the sugar or water industries and classified as competitor industries. Eleven disclosed non-industry funding and 13 disclosed no funding sources; these 2 groups were combined for analysis. Of the 18 reviews with disclosed funding sources, 10 stated that the sponsor was involved at some stage during the development of the manuscript.

Four reviews included meta-analyses. Only 6 reviews stated how many studies were included in the review. Weight outcomes assessed in the reviews include BMI, other measures of weight gain, and other measures of obesity. Adverse outcomes addressed in the reviews include diabetes ( $n = 17$ ) and hypertension ( $n = 5$ ).

Data extracted for each review are available in S2 Appendix.

**Risk of bias.** Agreement on coding of risk of bias by the two assessors was achieved for all reviews. Most of the included reviews had high or unclear risks of bias for each criterion (See Fig 2 and S3 Appendix). Eleven reviews reported their inclusion/exclusion criteria; only two reviews included two or more assessors for the evaluation of the evidence; six reviews included a comprehensive search strategy. The majority of the reviews (26/31) were coded as overall high risk of bias.

**Journal characteristics.** Twenty-seven reviews were published in peer-reviewed journals. We identified nineteen reviews published in non-industry funded journals and twelve reviews that were published in industry or mixed funded journals. Most reviews included studies on

**Table 1. Review characteristics and risk of bias by funding source (n = 31).**

| REVIEW CHARACTERISTICS                | FUNDING SOURCE |             |                |                |            |                     |            |
|---------------------------------------|----------------|-------------|----------------|----------------|------------|---------------------|------------|
|                                       | Total          | As Producer | Sugar Industry | Other Industry | Government | Private Non- Profit | No Funding |
|                                       | 31             | 4           | 3              | 1              | 7          | 3                   | 13         |
| <b>General</b>                        |                |             |                |                |            |                     |            |
| Time period covered stated (years)    | 6              | 1           | 1              | 0              | 2          | 0                   | 2          |
| Number of studies included stated     | 6              | 2           | 1              | 1              | 2          | 0                   | 0          |
| Meta-analysis                         | 4              | 2           | 0              | 1              | 1          | 0                   | 0          |
| <b>Weight Outcomes</b>                |                |             |                |                |            |                     |            |
| BMI (kg/m2)                           | 19             | 3           | 2              | 0              | 5          | 3                   | 6          |
| other measure of weight gain          | 31             | 4           | 3              | 1              | 7          | 3                   | 13         |
| other measure of obesity              | 19             | 2           | 2              | 0              | 5          | 3                   | 7          |
| <b>Adverse Outcomes</b>               |                |             |                |                |            |                     |            |
| Diabetes                              | 17             | 1           | 2              | 0              | 4          | 3                   | 7          |
| Hypertension                          | 5              | 0           | 0              | 0              | 1          | 1                   | 3          |
| <b>Risk of Bias</b>                   |                |             |                |                |            |                     |            |
| Inclusion/Exclusion Criteria          | 9              | 2           | 1              | 1              | 2          | 2                   | 1          |
| Two or more assessors                 | 2              | 0           | 0              | 0              | 2          | 0                   | 0          |
| Comprehensive Search Strategy         | 6              | 1           | 0              | 1              | 2          | 1                   | 1          |
| Methodological Discrepancies Explored | 13             | 2           | 1              | 1              | 4          | 1                   | 4          |
| <b>Journal Characteristics</b>        |                |             |                |                |            |                     |            |
| Peer-reviewed                         | 27             | 3           | 3              | 1              | 7          | 3                   | 10         |
| Non peer-reviewed                     | 4              | 1           | 0              | 0              | 0          | 0                   | 3          |

doi:10.1371/journal.pone.0162198.t001

multiple artificial sweeteners; 6 included studies on only one artificial sweetener (5 on aspartame only, 1 saccharin only).

### Relationship between review sponsorship and risk of bias

The proportion of artificial sweetener industry sponsored reviews with overall high risk of bias (3/4) is similar to the proportion of non-industry sponsored reviews (included reviews with no funding disclosed) (20/23) RR: 0.86 (95% CI: 0.48 to 1.55) and competitor industry sponsored

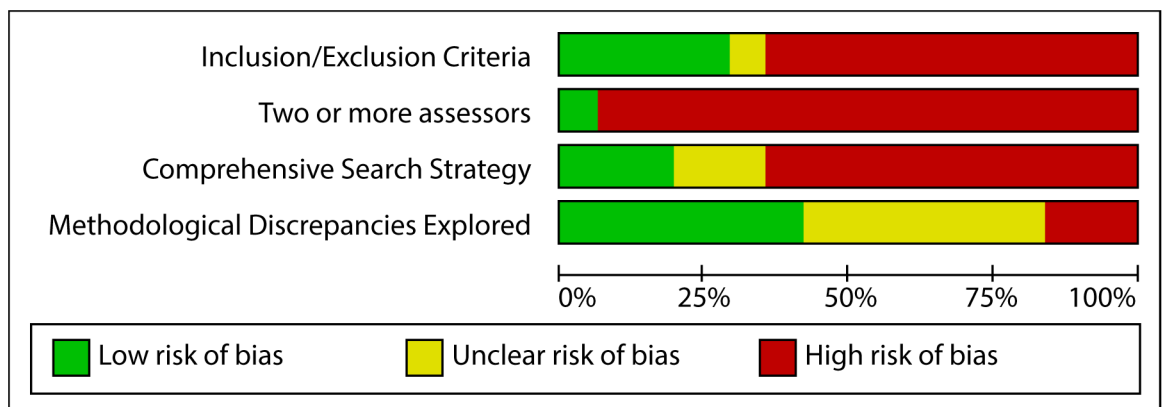

**Fig 2. Risk of bias graph: review authors' judgments about each risk of bias item presented as percentages across all included studies**

doi:10.1371/journal.pone.0162198.g002

**Table 2. Results and conclusions of reviews by funding source (n = 31).**

| REVIEW OUTCOMES   | FUNDING SOURCE |             |                |                |            |                     |            |
|-------------------|----------------|-------------|----------------|----------------|------------|---------------------|------------|
|                   | Total          | As Producer | Sugar Industry | Other Industry | Government | Private Non- Profit | No Funding |
|                   | 31             | 4           | 3              | 1              | 7          | 3                   | 13         |
| <b>Results</b>    |                |             |                |                |            |                     |            |
| Favorable         | 4              | 3           | 0              | 0              | 1          | 0                   | 0          |
| Unfavorable       | 15             | 0           | 1              | 1              | 5          | 1                   | 7          |
| Unclear           | 12             | 1           | 2              | 0              | 1          | 2                   | 6          |
| <b>Conclusion</b> |                |             |                |                |            |                     |            |
| Favorable         | 19             | 4           | 0              | 0              | 4          | 3                   | 8          |
| Unfavorable       | 12             | 0           | 3              | 1              | 3          | 0                   | 5          |

doi:10.1371/journal.pone.0162198.t002

reviews (3/4) RR: 1.00 (95% CI: 0.44 to 2.22). We performed a sensitivity analysis excluding the reviews with no funding disclosed from the non-industry sponsored group. The proportion of artificial sweetener industry sponsored reviews with overall high risk of bias (3/4) remained similar to the proportion of government and private non-profit reviews with high risk of bias (6/10), RR: 1.25 (95% CI: 0.58 to 2.67).

### Relationship between review sponsorship and review results

The results, reported in [Table 2](#) show that artificial sweetener industry sponsored reviews were more likely to have favorable results (3/4) than non-industry sponsored reviews (included reviews with no funding disclosed) (1/23), RR: 17.25 (95% CI: 2.34 to 127.29). We performed a sensitivity analysis excluding the reviews with no funding disclosed from the non-industry sponsored group. Artificial sweetener industry sponsored reviews still were more likely to have favorable results (3/4) than government and private no profit (1/10), RR: 7.5 (95% CI: 1.07 to 52.37).

Then we compared results reported in artificial sweetener industry sponsored reviews with competitor industry sponsored reviews. A greater proportion of artificial sweetener industry sponsored reviews had favorable results (3/4) compared to competitor industry sponsored reviews (0/4).

We could not reach consensus on the results of 12 reviews. The results of these reviews were so confusing or were presented so incompletely that coding the results according to our criteria would require extensive interpretation by the authors (assessors evaluation reported in [S2 Appendix](#)). Therefore, these results were coded as “unclear”(see [Methods](#)). Industry sponsored (3/8) and non-industry sponsored (9/23) reviews had a similar risk of reporting unclear results RR: 0.70 (95% CI: 0.32 to 1.55).

### Relationship between review sponsorship and review conclusions

Artificial sweetener industry sponsored reviews were more likely to have favorable conclusions (4/4) than non-industry sponsored reviews (included reviews with no funding disclosed) (15/23), RR: 1.52 (95% CI: 1.14 to 2.06) ([Table 2](#)). We performed a sensitivity analysis excluding the reviews with no funding disclosed from the non-industry sponsored group. Artificial sweetener industry sponsored reviews were still more likely to have favorable conclusions (4/4) than government and private non-profit (7/10), although this was not statistically significant RR: 1.42 (95% CI: 0.95 to 2.14).

**Table 3. Results and conclusions of reviews by conflicts of interest of authors (n = 31).**

| REVIEW OUTCOMES    | AUTHORS CONFLICT OF INTEREST |          |              |
|--------------------|------------------------------|----------|--------------|
|                    | Total                        | Industry | Non-Industry |
|                    | 31                           | 22       | 9            |
| <b>Results</b>     |                              |          |              |
| Favorable          | 4                            | 4        | 0            |
| Unfavorable        | 15                           | 7        | 8            |
| Unclear            | 12                           | 11       | 1            |
| <b>Conclusions</b> |                              |          |              |
| Favorable          | 19                           | 18       | 1            |
| Unfavorable        | 12                           | 4        | 8            |

doi:10.1371/journal.pone.0162198.t003

All four reviews funded by competitors of the artificial sweetener industry reported unfavorable conclusions (4/4) and all four reviews funded by the artificial sweetener industry had favorable conclusions, RR:  $\infty$  (95% CI: NaN to  $\infty$ ).

### Relationship between author financial conflict of interest and risk of bias

Reviews performed by authors with conflicts of interest had similar overall high risk of bias to reviews performed by authors without conflicts of interest RR: 0.92 (95% CI: 0.68 to 1.25). Eight of 9 reviews by authors without conflicts of interest had a high risk of bias, compared to 18 of 22 reviews by authors with conflicts of interest.

### Relationship between author financial conflicts of interest and review results

Table 3 summarizes the financial conflicts of interests of review authors. Authors of 42% (13/31) of reviews had conflicts of interest that were not disclosed in the article; most of these (n = 8) were in reviews that also had no disclosed funding sources. Most reviews were lacking disclosure statements for authors (19/31), regardless of whether the authors had a financial conflict of interest with the food industry (13/22) or not (6/9), with a similar likelihood of reporting between the two groups RR: 1.77 (95% CI: 0.66 to 4.76).

For 55% (17/31) of reviews, more than half of the authors had conflicts of interest with the food or beverage industry.

To test our hypothesis that reviews performed by authors with a conflict of interest with the food industry are more likely to report favorable results, we compared the 9 reviews including only authors that had no conflicts of interest with the food industry with 22 reviews performed by authors with disclosed or non-disclosed conflicts of interest (Table 4). None of the nine reviews performed by authors without conflicts of interest reported favorable results; whereas 4 reviews with authors with conflicts of interest had favorable results RR:  $\infty$  (95% CI: NaN to  $\infty$ ).

Reviews performed by authors with a conflict of interest with the food industry were more likely to report unclear results (11/22) than reviews performed by authors without conflicts of interest (1/8) RR: 4.50 (95% CI: 0.68 to 29.92).

### Relationship between author financial conflict of interest and review conclusions

Reviews performed by authors with a conflict of interest with the food industry were more likely to have favorable conclusions (18/22) than reviews performed by authors without

**Table 4. Authors' conflicts of interest by review funding source (n = 31).**

| REVIEW AUTHORS' CONFLICTS OF INTEREST | FUNDING SOURCE |             |                |                |            |                    |            |
|---------------------------------------|----------------|-------------|----------------|----------------|------------|--------------------|------------|
|                                       | Total          | As Producer | Sugar Industry | Other Industry | Government | Private Non-Profit | No Funding |
|                                       | 31             | 4           | 3              | 1              | 7          | 3                  | 13         |
| <b>Authors with COI</b>               |                |             |                |                |            |                    |            |
| Industry (Disclosed)                  | 9              | 4           | 2              | 1              | 1          | 1                  | 0          |
| Industry (Not Disclosed)              | 13             | 0           | 1              | 0              | 3          | 1                  | 8          |
| No disclosure                         | 6              | 0           | 0              | 0              | 1          | 1                  | 4          |
| No conflict                           | 3              | 0           | 0              | 0              | 2          | 0                  | 1          |
| <b>Proportion of Authors with COI</b> |                |             |                |                |            |                    |            |
| < = 50%                               | 5              | 0           | 0              | 1              | 1          | 2                  | 1          |
| >50%                                  | 17             | 4           | 3              | 0              | 3          | 0                  | 7          |
| No disclosure or conflict             | 9              | 0           | 0              | 0              | 3          | 1                  | 5          |

doi:10.1371/journal.pone.0162198.t004

conflicts of interest (4/9), RR: 7.36 (95% CI: 1.15 to 47.22). Notably, the only reviews performed by authors with conflicts of interest that reported unfavorable conclusions were all funded by competitor industries (4/4).

### Relationship of author financial conflicts of interest with concordance of review results and conclusion

All reviews that reported favorable conclusions and discordant (unfavorable) results were conducted by authors with conflicts of interest (5/5). None of these five reviews were sponsored by industry. All the reviews that reported favorable conclusions and concordant (favorable) results were performed by authors with financial conflicts of interest (4/4) and the majority were funded by the artificial sweetener industry (3/4). Of the ten reviews that reported unfavorable conclusions and concordant (unfavorable) results, eight were prepared by authors without conflicts of interest and two by authors with conflicts of interest (and funded by artificial sweetener competitor industries). Reviews by authors with conflicts of interest were less likely to have concordant results and conclusion than reviews by authors without conflicts of interest RR: 0.55 (95% CI: 0.32 to 0.94) (Table 3).

The relationship of source of sponsorship and concordance of review results and conclusion could not be calculated because of the small samples size and the high number of reviews with unclear results sponsored by the artificial sweetener (1/4) and competitor (2/4) industries (Table 2).

### Relationship between journal funding and risk of bias

Reviews published in industry or mixed funding journals had similar overall high risk of bias to reviews published in non-industry funded journals RR: 0.92 (95% CI: 0.68 to 1.25).

### Relationship between Journal Funding and Review Results

Only one review published in a non-industry funded journal reported favorable results (1/19) compared to 3/12 reviews published in journals with industry or mixed funding (Table 5). Reviews published in journals with industry or mixed funding were as likely to report favorable results (3/12) as reviews published in non-industry funded journals (1/19) RR: 4.75 (95% CI: 0.56 to 40.56).

**Table 5. Results and conclusions of reviews by journal funding (n = 31).**

| REVIEW OUTCOMES    | JOURNAL FUNDING |          |       |              |
|--------------------|-----------------|----------|-------|--------------|
|                    | Total           | Industry | Mixed | Non-Industry |
|                    | 31              | 4        | 8     | 19           |
| <b>Results</b>     |                 |          |       |              |
| Favorable          | 4               | 0        | 3     | 1            |
| Unfavorable        | 15              | 2        | 1     | 12           |
| Unclear            | 12              | 2        | 4     | 6            |
| <b>Conclusions</b> |                 |          |       |              |
| Favorable          | 19              | 3        | 8     | 8            |
| Unfavorable        | 12              | 1        | 0     | 11           |

doi:10.1371/journal.pone.0162198.t005

### Relationship between journal funding and review conclusions

Almost all the reviews published in industry or mixed funded journals reported favorable conclusions (11/12) (Table 5). Reviews published in industry and mixed funded journals more often had favorable conclusions (11/12) than reviews published in non-industry funded journals (8/19) RR: 2.18 (95% CI: 1.25 to 3.79).

### Discussion

Our findings show that review sponsorship, financial conflicts of interests of authors and journal funding are all associated with favorable outcomes related to the effects of artificially sweetened beverages on weight outcomes. Reviews sponsored by the artificial sweetener industry were more likely to report results and conclusions that favored artificially sweetened beverages than non-industry sponsored reviews. We also found that reviews performed by authors with a conflict of interest with the food industry were more likely to have results and conclusions that favored artificially sweetened beverages than reviews performed by authors without financial conflicts of interest. Reviews performed by authors with financial conflicts of interest also were more likely to report unclear results and to lack concordance between results and conclusions. The lack of concordance was primarily due to the reviews having favorable conclusions when the results were unclear or not favorable. Thus, authors with financial conflicts of interest with the food industry were more likely to put a positive “spin” on the conclusions of their reviews [49].

Our study is consistent with similar recent findings that the main global sweetener producer, the cane and beet sugar industry, also supports research that favors their product. Reviews of the health effects of sugar sweetened beverages performed by authors with financial ties to the sugar industry are five times more likely to conclude there is no association of sugar consumption with weight gain [42]. Our results are also in line with the consolidated evidence that industry sponsorship of various types of research is associated with favorable outcomes for the sponsor in both human [29, 31–34] and animal studies [35, 36].

We also found that reviews performed by artificial sweetener industry competitors (e.g. the sugar industry) were more likely to have unfavorable results and conclusions on the effects of artificially sweetened beverages on weight than artificial sweetener industry sponsored reviews and non-industry sponsored reviews. These findings suggest that fair evaluations of safety and effectiveness of products might be potentially undermined by reviews on a product performed by competitors. Therefore, competitor funding should be considered as a source of bias in reviews of a product.

Moreover, we showed that reviews published in journals funded partially or in full by the food industry more often have conclusions that are favorable towards artificially sweetened

beverages than reviews published in non-industry funded journals. The role of the funding of journals and its effects on study outcomes has been rarely investigated, and early (and recent) warnings on the risk of transforming healthcare, environmental and toxicological journals into marketing instruments have been largely ignored [50–53].

Notably, the differences in the results and conclusions that we observed related to sponsorship, author conflicts of interest and journal funding cannot be explained by differences in the risks of bias in how the reviews were conducted. Risk of bias of the reviews was high in all comparison groups. To reduce bias, reviews of the effects of artificial sweeteners on weight need improvement in their search strategies, data collection and assessment of included studies. In addition, the majority of the reviews were published in peer-reviewed journals. Although peer review can be a valuable tool for increasing the quality of scientific publication [54], it is not sufficient to mitigate the observed influence of study sponsorship, conflict of interest and journal funding on review results and conclusions.

Almost half of the reviews had authors that failed to disclose relevant conflicts of interest with the food industry. This lack of disclosure is consistent with the lack of transparency and compliance with conflict of interest disclosure policies reported in several fields [48, 55–58]. Thus, disclosures in journals do not give an accurate assessment of authors' conflicts of interest. Further investigation of authors' financial ties using different databases, disclosures made in other research articles, and additional resources may be necessary to provide a more accurate description than a single declaration of interest within a single publication. In addition, journals need to enforce their disclosure requirements and penalize authors who fail to disclose. The WHO/IARC, the US Institute of Medicine, the ICMJE and the Collegium Ramazzini have all pointed out the need for transparency and accountability in policies for declaration of interest [47, 59–62]. The US National Library of Medicine was also recently urged to include information about authors' competing interests in the abstracts of articles submitted to PubMed, the library's online database of biomedical literature [63].

Our systematic review had limitations related to the conduct and reporting of the included reviews, as well as the small sample size of studies available. Our analysis relies on how included reviews defined "funding" and "financial conflict of interest of the authors" and we cannot exclude the possibility that other financial interests and other sources of funding were present. In addition, we categorized industry funding into artificial sweetener industry, competitor industry and other industry. This is necessary because the interests of these different corporate sponsors differ, but it resulted in small number of reviews in each category. Also, categorizing funding sources in the food industry is complicated. For example, we categorized the American Diabetes Association as non-profit. However, the ADA is supported by a variety of companies (e.g. Johnson and Johnson, Nutrisystem) that produce or sell artificial sweeteners, as reported also by CSPI [64–66]. We conducted additional analyses where we categorized the American Diabetes Association as the artificial sweetener industry and this did not change the observed association of artificial sweetener industry funding with the results or conclusions of the reviews.

There is increasing momentum towards the inclusion of funding source and author conflicts of interest as a risk of bias domain for evidence-based evaluation. The Navigation Guide already includes both as a risk of bias domain in both human and animal studies [67, 68], while Cochrane and GRADE are considering it, but have not yet adopted it [69]. According to the US Agency for Healthcare Research and Quality and the US National Toxicology Program, funding source is recommended as a factor to consider when evaluating risk of bias of individual studies for selective reporting and then again for evaluating the body of evidence for publication bias [67, 68, 70]. The US Food and Drug Administration and the European Food Safety Authority, that evaluate safety and risks of food consumption, both pre and post marketing,

including effects on weight of sweeteners, and eventually establish an Acceptable Daily Intake (ADI) [71–73] were recently criticized for the number of panelists with financial interests raising concerns on the integrity and transparency of their evaluation processes [74–76]. The Advisory Committee of the Dietary Guidelines for Americans 2015–2020 considered several reviews, but did not assess funding source as a risk of bias [7]. Our results confirm that funding source and conflicts of interest are a source of bias in reviews that cannot be detected by other risk of bias rating criteria.

## Conclusion

Our systematic review shows that financial conflicts of interest introduced a bias at all levels of the research and publication process (author financial ties, review sponsorship and journal funding), affecting the outcomes of reviews and possibly undermining the quality and transparency of public health evaluations that are reliant on these reviews. The bias introduced by financial interests could not be ascribed to the overall risk of bias of the reviews and was not prevented by the peer review process.

## Supporting Information

### S1 Appendix. Search Strategy.

(DOCX)

### S2 Appendix. Database.

(XLS)

### S3 Appendix. Risk of Bias.

(DOCX)

### S1 File. List of Excluded Studies.

(DOCX)

### S2 File. PRISMA Checklist.

(DOC)

## Acknowledgments

Gloria Wong, University of California San Francisco.

Fiorella Belpoggi, Cesare Maltoni Cancer Research Center, Ramazzini Institute.

Ellen Silbergeld, Bloomberg School of Public Health, Johns Hopkins University.

Alice Fabbri and Nicholas Gardon, University of Sydney.

In memory of Elizabeth Waters, University of Melbourne.

## Author Contributions

**Conceptualization:** DM CEK LAB.

**Data curation:** DM CEK LAB.

**Formal analysis:** DM CEK LAB.

**Investigation:** DM CEK LAB.

**Methodology:** DM CEK LAB.

**Supervision:** LAB.



**Writing – original draft:** DM CEK LAB.

**Writing – review & editing:** DM CEK LAB.

## References

1. WHO. Fact sheet N 311, Obesity and overweight. Updated January 2015. Available: <http://www.who.int/mediacentre/factsheets/fs311/en/> 2015.
2. Ng SW, Slining MM, Popkin BM. Use of caloric and noncaloric sweeteners in US consumer packaged foods, 2005–2009. *J Acad Nutr Diet*. 2012; 112(11):1828–34 e1–6. Epub 2012/10/30. doi: [10.1016/j.jand.2012.07.009](https://doi.org/10.1016/j.jand.2012.07.009) PMID: [23102182](https://pubmed.ncbi.nlm.nih.gov/23102182/); PubMed Central PMCID: [PMC3490437](https://pubmed.ncbi.nlm.nih.gov/PMC3490437/).
3. OECD. Obesity Update 2014. Available: <http://www.oecd.org/health/Obesity-Update-2014.pdf>. OECD; 2014.
4. WHO. Global action plan for the prevention and control of noncommunicable diseases 2013–2020. Available: [http://apps.who.int/iris/bitstream/10665/94384/1/9789241506236\\_eng.pdf](http://apps.who.int/iris/bitstream/10665/94384/1/9789241506236_eng.pdf) 2013.
5. NCI. Mean Intake of Added Sugars & Percentage Contribution of Various Foods Among US Population, by Age, NHANES 2005–06. Available: [http://appliedresearch.cancer.gov/diet/foodsources/added\\_sugars/table5a.html](http://appliedresearch.cancer.gov/diet/foodsources/added_sugars/table5a.html). 2013.
6. Singh GM, Micha R, Khatibzadeh S, Lim S, Ezzati M, Mozaffarian D. Estimated Global, Regional, and National Disease Burdens Related to Sugar-Sweetened Beverage Consumption in 2010. *Circulation*. 2015; 132(8):639–66. Epub 2015/07/01. doi: [10.1161/circulationaha.114.010636](https://doi.org/10.1161/circulationaha.114.010636) PMID: [26124185](https://pubmed.ncbi.nlm.nih.gov/26124185/); PubMed Central PMCID: [PMC4550496](https://pubmed.ncbi.nlm.nih.gov/PMC4550496/).
7. DGAC. Dietary Guidelines for Americans 2015–2020. Eighth Edition Washington (DC): USDA and US Department of Health and Human Services. Available: <http://health.gov/dietaryguidelines/2015/guidelines/>. 2016.
8. WHO. Sugars Intake for Adults and Children. Guideline. World Health Organization: Geneva, Switzerland Available: [http://www.who.int/nutrition/publications/guidelines/sugars\\_intake/en/](http://www.who.int/nutrition/publications/guidelines/sugars_intake/en/). 2015.
9. SACN. Carbohydrates and Health. Available: [https://www.gov.uk/government/uploads/system/uploads/attachment\\_data/file/445503/SACN\\_Carbohydrates\\_and\\_Health.pdf](https://www.gov.uk/government/uploads/system/uploads/attachment_data/file/445503/SACN_Carbohydrates_and_Health.pdf). 2015.
10. NHLBI. Expert panel on integrated guidelines for cardiovascular health and risk reduction in children and adolescents: summary report. *Pediatrics*. 2011; 128 Suppl 5:S213–56. Epub 2011/11/16. doi: [10.1542/peds.2009-2107C](https://doi.org/10.1542/peds.2009-2107C) PMID: [22084329](https://pubmed.ncbi.nlm.nih.gov/22084329/); PubMed Central PMCID: [PMC4536582](https://pubmed.ncbi.nlm.nih.gov/PMC4536582/).
11. Popkin BM, Hawkes C. Sweetening of the global diet, particularly beverages: patterns, trends, and policy responses. *The Lancet Diabetes & Endocrinology*. doi: [10.1016/S2213-8587\(15\)00419-2](https://doi.org/10.1016/S2213-8587(15)00419-2)
12. French SA, Lin BH, Guthrie JF. National trends in soft drink consumption among children and adolescents age 6 to 17 years: prevalence, amounts, and sources, 1977/1978 to 1994/1998. *J Am Diet Assoc*. 2003; 103(10):1326–31. Epub 2003/10/02. PMID: [14520252](https://pubmed.ncbi.nlm.nih.gov/14520252/).
13. Striegel-Moore RH, Thompson D, Affenito SG, Franko DL, Obarzanek E, Barton BA, et al. Correlates of beverage intake in adolescent girls: the National Heart, Lung, and Blood Institute Growth and Health Study. *The Journal of pediatrics*. 2006; 148(2):183–7. Epub 2006/02/24. doi: [10.1016/j.jpeds.2005.11.025](https://doi.org/10.1016/j.jpeds.2005.11.025) PMID: [16492426](https://pubmed.ncbi.nlm.nih.gov/16492426/).
14. Kral TV, Stunkard AJ, Berkowitz RI, Stallings VA, Moore RH, Faith MS. Beverage consumption patterns of children born at different risk of obesity. *Obesity (Silver Spring, Md)*. 2008; 16(8):1802–8. Epub 2008/06/07. doi: [10.1038/oby.2008.287](https://doi.org/10.1038/oby.2008.287) PMID: [18535546](https://pubmed.ncbi.nlm.nih.gov/18535546/); PubMed Central PMCID: [PMC2917048](https://pubmed.ncbi.nlm.nih.gov/PMC2917048/).
15. Mesirow MS, Welsh JA. Changing beverage consumption patterns have resulted in fewer liquid calories in the diets of US children: National Health and Nutrition Examination Survey 2001–2010. *J Acad Nutr Diet*. 2015; 115(4):559–66 e4. Epub 2014/12/03. doi: [10.1016/j.jand.2014.09.004](https://doi.org/10.1016/j.jand.2014.09.004) PMID: [25441966](https://pubmed.ncbi.nlm.nih.gov/25441966/).
16. BCC. Global Markets for Sugars and Sweeteners in Processed Foods and Beverages. BCC Research, 2015 Jun 2015. Report No.
17. Sylvetsky AC, Rother KI. Trends in the consumption of low-calorie sweeteners. *Physiology & behavior*. 2016. Epub 2016/04/04. doi: [10.1016/j.physbeh.2016.03.030](https://doi.org/10.1016/j.physbeh.2016.03.030) PMID: [27039282](https://pubmed.ncbi.nlm.nih.gov/27039282/).
18. Imamura F, O'Connor L, Ye Z, Mursu J, Hayashino Y, Bhupathiraju SN, et al. Consumption of sugar sweetened beverages, artificially sweetened beverages, and fruit juice and incidence of type 2 diabetes: systematic review, meta-analysis, and estimation of population attributable fraction. *BMJ (Clinical research ed)*. 2015; 351:h3576. Epub 2015/07/23. doi: [10.1136/bmj.h3576](https://doi.org/10.1136/bmj.h3576) PMID: [26199070](https://pubmed.ncbi.nlm.nih.gov/26199070/); PubMed Central PMCID: [PMC4510779](https://pubmed.ncbi.nlm.nih.gov/PMC4510779/).
19. Schernhammer ES, Bertrand KA, Birmann BM, Sampson L, Willett WC, Feskanich D. Consumption of artificial sweetener- and sugar-containing soda and risk of lymphoma and leukemia in men and women.

- The American journal of clinical nutrition. 2012; 96(6):1419–28. Epub 2012/10/26. doi: [10.3945/ajcn.111.030833](https://doi.org/10.3945/ajcn.111.030833) PMID: [23097267](https://pubmed.ncbi.nlm.nih.gov/23097267/); PubMed Central PMCID: PMCPCMC3497928.
20. Soffritti M, Padovani M, Tibaldi E, Falcioni L, Manservigi F, Belpoggi F. The carcinogenic effects of aspartame: The urgent need for regulatory re-evaluation. *American journal of industrial medicine*. 2014; 57(4):383–97. Epub 2014/01/18. doi: [10.1002/ajim.22296](https://doi.org/10.1002/ajim.22296) PMID: [24436139](https://pubmed.ncbi.nlm.nih.gov/24436139/).
  21. Blum JW, Jacobsen DJ, Donnelly JE. Beverage consumption patterns in elementary school aged children across a two-year period. *J Am Coll Nutr*. 2005; 24(2):93–8. Epub 2005/03/31. PMID: [15798075](https://pubmed.ncbi.nlm.nih.gov/15798075/).
  22. Olivier B, Serge AH, Catherine A, Jacques B, Murielle B, Marie-Chantal CL, et al. Review of the nutritional benefits and risks related to intense sweeteners. *Arch Public Health*. 2015; 73:41. Epub 2015/10/03. doi: [10.1186/s13690-015-0092-x](https://doi.org/10.1186/s13690-015-0092-x) PMID: [26430511](https://pubmed.ncbi.nlm.nih.gov/26430511/).
  23. Palmnas MS, Cowan TE, Bomhof MR, Su J, Reimer RA, Vogel HJ, et al. Low-dose aspartame consumption differentially affects gut microbiota-host metabolic interactions in the diet-induced obese rat. *PLOS one*. 2014; 9(10):e109841. Epub 2014/10/15. doi: [10.1371/journal.pone.0109841](https://doi.org/10.1371/journal.pone.0109841) PMID: [25313461](https://pubmed.ncbi.nlm.nih.gov/25313461/); PubMed Central PMCID: PMCPCMC4197030.
  24. Araujo JR, Martel F, Keating E. Exposure to non-nutritive sweeteners during pregnancy and lactation: Impact in programming of metabolic diseases in the progeny later in life. *Reproductive toxicology (Elmsford, NY)*. 2014; 49C:196–201. Epub 2014/09/30. doi: [10.1016/j.reprotox.2014.09.007](https://doi.org/10.1016/j.reprotox.2014.09.007) PMID: [25263228](https://pubmed.ncbi.nlm.nih.gov/25263228/).
  25. Suez J, Korem T, Zeevi D, Zilberman-Schapira G, Thaiss CA, Maza O, et al. Artificial sweeteners induce glucose intolerance by altering the gut microbiota. *Nature*. 2014; 514(7521):181–6. Epub 2014/09/19. doi: [10.1038/nature13793](https://doi.org/10.1038/nature13793) PMID: [25231862](https://pubmed.ncbi.nlm.nih.gov/25231862/).
  26. Pereira MA. Diet beverages and the risk of obesity, diabetes, and cardiovascular disease: A review of the evidence. *Nutrition Reviews*. 2013; 71(7):433–40. doi: [10.1111/nure.12038](https://doi.org/10.1111/nure.12038) PMID: [23815142](https://pubmed.ncbi.nlm.nih.gov/23815142/)
  27. Birch LL, McPhee L, Sullivan S. Children's food intake following drinks sweetened with sucrose or aspartame: time course effects. *Physiology & behavior*. 1989; 45(2):387–95. Epub 1989/02/01. PMID: [2756027](https://pubmed.ncbi.nlm.nih.gov/2756027/).
  28. Anton SD, Martin CK, Han H, Coulon S, Cefalu WT, Geiselman P, et al. Effects of stevia, aspartame, and sucrose on food intake, satiety, and postprandial glucose and insulin levels. *Appetite*. 2010; 55(1):37–43. Epub 2010/03/23. doi: [10.1016/j.appet.2010.03.009](https://doi.org/10.1016/j.appet.2010.03.009) PMID: [20303371](https://pubmed.ncbi.nlm.nih.gov/20303371/); PubMed Central PMCID: PMCPCMC2900484.
  29. Lundh A, Sismondo S, Lexchin J, Busuioic OA, Bero L. Industry sponsorship and research outcome. *The Cochrane database of systematic reviews*. 2012; 12:Mr000033. Epub 2012/12/14. doi: [10.1002/14651858.MR000033.pub2](https://doi.org/10.1002/14651858.MR000033.pub2) PMID: [23235689](https://pubmed.ncbi.nlm.nih.gov/23235689/).
  30. Yank V, Rennie D, Bero LA. Financial ties and concordance between results and conclusions in meta-analyses: retrospective cohort study. *BMJ (Clinical research ed)*. 2007; 335(7631):1202–5. Epub 2007/11/21. doi: [10.1136/bmj.39376.447211.BE](https://doi.org/10.1136/bmj.39376.447211.BE) PMID: [18024482](https://pubmed.ncbi.nlm.nih.gov/18024482/); PubMed Central PMCID: PMCPCMC2128658.
  31. Barnes DE, Bero LA. Why review articles on the health effects of passive smoking reach different conclusions. *JAMA: the journal of the American Medical Association*. 1998; 279(19):1566–70. PMID: [9605902](https://pubmed.ncbi.nlm.nih.gov/9605902/)
  32. Barnes DE, Bero LA. Scientific quality of original research articles on environmental tobacco smoke. *Tob Control*. 1997; 6(1):19–26. Epub 1997/04/01. PMID: [9176982](https://pubmed.ncbi.nlm.nih.gov/9176982/); PubMed Central PMCID: PMCPCMC1759539.
  33. Popelut A, Valet F, Fromentin O, Thomas A, Bouchard P. Relationship between sponsorship and failure rate of dental implants: a systematic approach. *PLOS one*. 2010; 5(4):e10274. Epub 2010/04/28. doi: [10.1371/journal.pone.0010274](https://doi.org/10.1371/journal.pone.0010274) PMID: [20422000](https://pubmed.ncbi.nlm.nih.gov/20422000/); PubMed Central PMCID: PMCPCMC2858083.
  34. Shah RV, Albert TJ, Bruegel-Sanchez V, Vaccaro AR, Hilibrand AS, Grauer JN. Industry support and correlation to study outcome for papers published in *Spine*. *Spine (Phila Pa 1976)*. 2005; 30(9):1099–104; discussion 105. Epub 2005/05/03. PMID: [15864166](https://pubmed.ncbi.nlm.nih.gov/15864166/).
  35. Abdel-Sattar M, Krauth D, Anglemeyer A, Bero L. The Relationship between Risk of Bias Criteria, Research Outcomes, and Study Sponsorship in a Cohort of Preclinical Thiazolidinedione Animal Studies: A Meta-Analysis. *Evid Based Preclin Med*. 2014; 1(1):11–20. Epub 2015/02/03. doi: [10.1002/ebm2.5](https://doi.org/10.1002/ebm2.5) PMID: [25642330](https://pubmed.ncbi.nlm.nih.gov/25642330/); PubMed Central PMCID: PMCPCMC4306285.
  36. Krauth D, Anglemeyer A, Philipps R, Bero L. Nonindustry-Sponsored Preclinical Studies on Statins Yield Greater Efficacy Estimates Than Industry-Sponsored Studies: A Meta-Analysis. *PLOS Biol*. 2014; 12(1):e1001770. doi: [10.1371/journal.pbio.1001770](https://doi.org/10.1371/journal.pbio.1001770) PMID: [24465178](https://pubmed.ncbi.nlm.nih.gov/24465178/)
  37. Bero L, Oostvogel F, Bacchetti P, Lee K. Factors Associated with Findings of Published Trials of Drug-Drug Comparisons: Why Some Statins Appear More Efficacious than Others. *PLOS Med*. 2007; 4(6):e184. doi: [10.1371/journal.pmed.0040184](https://doi.org/10.1371/journal.pmed.0040184) PMID: [17550302](https://pubmed.ncbi.nlm.nih.gov/17550302/)

38. NRC. Review of EPA's Integrated Risk Information System (IRIS) Process. Washington, DC: The National Academies Press; 2014. 170 p.
39. Organization WH. WHO handbook for guideline development: World Health Organization; 2014.
40. Kearns CE, Glantz SA, Schmidt LA. Sugar industry influence on the scientific agenda of the National Institute of Dental Research's 1971 National Caries Program: a historical analysis of internal documents. *PLOS Med.* 2015; 12(3):e1001798. Epub 2015/03/11. doi: [10.1371/journal.pmed.1001798](https://doi.org/10.1371/journal.pmed.1001798) PMID: [25756179](https://pubmed.ncbi.nlm.nih.gov/25756179/); PubMed Central PMCID: PMC4355299.
41. Taubes G, Couzens CK. Big sugar's sweet little lies: how the industry kept scientists from asking, does sugar kill. *Mother Jones* <http://www.motherjones.com/environment/2012/10/sugar-industry-liescampaign> Accessed. 2014;17.
42. Bes-Rastrollo M, Schulze MB, Ruiz-Canela M, Martinez-Gonzalez MA. Financial conflicts of interest and reporting bias regarding the association between sugar-sweetened beverages and weight gain: a systematic review of systematic reviews. *PLOS Med.* 2013; 10(12):e1001578; discussion e. Epub 2014/01/07. doi: [10.1371/journal.pmed.1001578](https://doi.org/10.1371/journal.pmed.1001578) PMID: [24391479](https://pubmed.ncbi.nlm.nih.gov/24391479/); PubMed Central PMCID: PMC3876974.
43. Walton RG. Survey of aspartame studies: correlation of outcome and funding sources. Available: <http://www.dorway.com/peerrev.html>. 1999.
44. Millstone E. EFSA on Aspartame, January and December 2013. Available: [http://www.laleva.org/it/docs/Millstone\\_EFSA\\_Aspartame\\_9Jan2014.pdf](http://www.laleva.org/it/docs/Millstone_EFSA_Aspartame_9Jan2014.pdf). 2014.
45. FDA. Guidance for Industry: Evidence-Based Review System for the Scientific Evaluation of Health Claims-Final. Retrieved from: Date Published: January. 2009.
46. Anglemyer A, Horvath HT, Bero L. Healthcare outcomes assessed with observational study designs compared with those assessed in randomized trials. *The Cochrane database of systematic reviews.* 2014; 4:Mr000034. Epub 2014/05/02. doi: [10.1002/14651858.MR000034.pub2](https://doi.org/10.1002/14651858.MR000034.pub2) PMID: [24782322](https://pubmed.ncbi.nlm.nih.gov/24782322/).
47. ICMJE ICoMJE-. ICMJE form for disclosure of potential conflicts of interest.
48. Forsyth SR, Odierna DH, Krauth D, Bero LA. Conflicts of interest and critiques of the use of systematic reviews in policymaking: an analysis of opinion articles. *Syst Rev.* 2014; 3:122. Epub 2014/11/25. doi: [10.1186/2046-4053-3-122](https://doi.org/10.1186/2046-4053-3-122) PMID: [25417178](https://pubmed.ncbi.nlm.nih.gov/25417178/); PubMed Central PMCID: PMC4241194.
49. Boutron I, Dutton S, Ravaud P, Altman DG. Reporting and interpretation of randomized controlled trials with statistically nonsignificant results for primary outcomes. *JAMA: the journal of the American Medical Association.* 2010; 303(20):2058–64. Epub 2010/05/27. doi: [10.1001/jama.2010.651](https://doi.org/10.1001/jama.2010.651) PMID: [20501928](https://pubmed.ncbi.nlm.nih.gov/20501928/).
50. Axelson O, Balbus JM, Cohen G, Davis D, Donnay A, Doolittle R, et al. Re: Regulatory Toxicology and Pharmacology. *International journal of occupational and environmental health.* 2003; 9(4):386–9; author reply 9–90. Epub 2003/12/11. doi: [10.1179/oeht.2003.9.4.386](https://doi.org/10.1179/oeht.2003.9.4.386) PMID: [14664493](https://pubmed.ncbi.nlm.nih.gov/14664493/).
51. Smith R. Medical Journals Are an Extension of the Marketing Arm of Pharmaceutical Companies. *PLOS Med.* 2005; 2(5):e138. doi: [10.1371/journal.pmed.0020138](https://doi.org/10.1371/journal.pmed.0020138) PMID: [15916457](https://pubmed.ncbi.nlm.nih.gov/15916457/)
52. Grandjean P, Ozonoff D. Transparency and translation of science in a modern world. *Environmental Health.* 2013; 12:70-. doi: [10.1186/1476-069X-12-70](https://doi.org/10.1186/1476-069X-12-70). PMC3765922. PMID: [23981514](https://pubmed.ncbi.nlm.nih.gov/23981514/)
53. Lundh A, Barbateskovic M, Hróbjartsson A, Gøtzsche PC. Conflicts of Interest at Medical Journals: The Influence of Industry-Supported Randomised Trials on Journal Impact Factors and Revenue—Cohort Study. *PLOS Medicine.* 2010; 7(10):e1000354. doi: [10.1371/journal.pmed.1000354](https://doi.org/10.1371/journal.pmed.1000354). PMC2964336. PMID: [21048986](https://pubmed.ncbi.nlm.nih.gov/21048986/)
54. Siler K, Lee K, Bero L. Measuring the effectiveness of scientific gatekeeping. *Proceedings of the National Academy of Sciences of the United States of America.* 2015; 112(2):360–5. doi: [10.1073/pnas.1418218112](https://doi.org/10.1073/pnas.1418218112). PMC4299220. PMID: [25535380](https://pubmed.ncbi.nlm.nih.gov/25535380/)
55. Ruff K. Scientific journals and conflict of interest disclosure: what progress has been made? *Environmental Health.* 2015; 14:45. doi: [10.1186/s12940-015-0035-6](https://doi.org/10.1186/s12940-015-0035-6). PMC4450857. PMID: [26024916](https://pubmed.ncbi.nlm.nih.gov/26024916/)
56. Resnik DB. Science and money: problems and solutions. *Journal of microbiology & biology education.* 2014; 15(2):159.
57. Baethge C. The effect of a conflict of interest disclosure form using closed questions on the number of positive conflicts of interest declared—a controlled study. *PeerJ.* 2013; 1:e128. doi: [10.7717/peerj.128](https://doi.org/10.7717/peerj.128) PMID: [24024081](https://pubmed.ncbi.nlm.nih.gov/24024081/)
58. Roseman M, Millette K, Bero LA, Coyne JC, Lexchin J, Turner EH, et al. Reporting of conflicts of interest in meta-analyses of trials of pharmacological treatments. *JAMA: the journal of the American Medical Association.* 2011; 305(10):1008–17. Epub 2011/03/10. doi: [10.1001/jama.2011.257](https://doi.org/10.1001/jama.2011.257) PMID: [21386079](https://pubmed.ncbi.nlm.nih.gov/21386079/).
59. Portier CJ, Armstrong BK, Baguley BC, Baur X, Belyaev I, Belle R, et al. Differences in the carcinogenic evaluation of glyphosate between the International Agency for Research on Cancer (IARC) and the European Food Safety Authority (EFSA). *J Epidemiol Community Health.* 2016. Epub 2016/03/05. doi: [10.1136/jech-2015-207005](https://doi.org/10.1136/jech-2015-207005) PMID: [26941213](https://pubmed.ncbi.nlm.nih.gov/26941213/).

60. Cogliano VJ, Baan RA, Straif K, Grosse Y, Secretan MB, El Ghissassi F, et al. The science and practice of carcinogen identification and evaluation. *Environmental health perspectives*. 2004; 112(13):1269–74. Epub 2004/09/04. PMID: [15345338](#); PubMed Central PMCID: PMCPMC1247515.
61. Collegium Ramazzini. 17th Collegium Ramazzini Statement: Most Types of Cancer Are Not Due to Bad Luck. Available: [http://www.collegiumramazzini.org/download/17\\_SeventeenthCRStatement%282015%29.pdf](http://www.collegiumramazzini.org/download/17_SeventeenthCRStatement%282015%29.pdf). 2015.
62. Lo B, Field MJ. Conflict of interest in medical research, education, and practice: National Academies Press; 2009.
63. McCarthy M. PubMed is urged to include competing interest information in abstracts. *BMJ (Clinical research ed)*. 2016; 353:i2018. Epub 2016/04/09. doi: [10.1136/bmj.i2018](#) PMID: [27056448](#).
64. American Diabetes A. Our Corporate Supporters. Available: <http://www.diabetes.org/about-us/corporate-support/our-corporate-supporters.html>. 2016.
65. Wire B. Research Confirms Cutting Back on Added Sugars Can Be a Successful Tool in Losing Excess Weight. September 1, 2015. Available: <http://www.businesswire.com/news/home/20150901005342/en/Research-Confirms-Cutting-Added-Sugars-Successful-Tool>. 2015.
66. CSPI. Non-Profit Organization with Ties to Industry. Available: [http://www.cspinet.org/integrity/corp\\_funding.html](http://www.cspinet.org/integrity/corp_funding.html). 2016.
67. Viswanathan M, Ansari MT, Berkman ND, Chang S, Hartling L, McPheeters M, et al. Assessing the Risk of Bias of Individual Studies in Systematic Reviews of Health Care Interventions. *Methods Guide for Effectiveness and Comparative Effectiveness Reviews*. Rockville MD 2012.
68. Woodruff TJ, Sutton P. The Navigation Guide systematic review methodology: a rigorous and transparent method for translating environmental health science into better health outcomes. *Environmental health perspectives*. 2014; 122(10):1007–14. doi: [10.1289/ehp.1307175](#) PMID: [24968373](#)
69. Bero LA. Why the Cochrane Risk of Bias Tool Should Include Funding Source as a Standard Item. *Cochrane Database of Systematic Reviews*. 2013;(12):ED000075. Artn Ed000075 doi: [10.1002/14651858.Ed000075](#). WOS:000343045600002. PMID: [24575439](#)
70. NTP-OHAT. Handbook for Conducting a Literature Based Health Assessment Using OHAT Approach for Systematic Review and Evidence Integration. Available: [https://ntp.niehs.nih.gov/ntp/ohat/pubs/handbookjan2015\\_508.pdf](https://ntp.niehs.nih.gov/ntp/ohat/pubs/handbookjan2015_508.pdf). 2015. Accessed 10 April 2015.
71. EFSA. Scientific Opinion on the substantiation of health claims related to intense sweeteners and contribution to the maintenance or achievement of a normal body weight (ID 1136, 1444, 4299), reduction of post-prandial glycaemic responses (ID 4298), maintenance of normal blood glucose concentrations (ID 1221, 4298), and maintenance of tooth mineralisation by decreasing tooth demineralisation (ID 1134, 1167, 1283) pursuant to Article 13(1) of Regulation (EC) No 1924/2006. *EFSA Journal*. 2011; 9(6):2229. doi: [10.2903/j.efsa.2011.2229](#)
72. EFSA. Scientific Opinion on Dietary Reference Values for carbohydrates and dietary fibre. *EFSA Journal*. 2010; 8(3):146. doi: [10.2903/j.efsa.2010.1462](#)
73. FDA. Additional Information about High-Intensity Sweeteners Permitted for use in Food in the United States. 2015. Available: <http://www.fda.gov/Food/IngredientsPackagingLabeling/FoodAdditivesIngredients/ucm397725.htm>—SummaryTable.
74. Robinson C, Holland N, Leloup D, Muilerman H. Conflicts of interest at the European Food Safety Authority erode public confidence. *Journal of Epidemiology and Community Health*. 2013. doi: [10.1136/jech-2012-202185](#)
75. Horel S. Corporate Europe Observatory. Unhappy meal: The European food safety authority's independence problem. 2013. Available: [http://corporateeurope.org/sites/default/files/attachments/unhappy\\_meal\\_report\\_23\\_10\\_2013.pdf](http://corporateeurope.org/sites/default/files/attachments/unhappy_meal_report_23_10_2013.pdf).
76. Neltner TG, Alger HM, O'Reilly JT, Krinsky S, Bero LA, Maffini MV. Conflicts of interest in approvals of additives to food determined to be generally recognized as safe: out of balance. *JAMA internal medicine*. 2013; 173(22):2032–6. Epub 2013/08/09. doi: [10.1001/jamainternmed.2013.10559](#) PMID: [23925593](#).
