# Supplementary material for: Relationship between Research Outcomes and Risk of Bias, Study Sponsorship, and Author Financial Conflicts of Interest in Reviews of the Effects of Artificially Sweetened Beverages on Weight Outcomes: A Systematic Review of Reviews
Source: PLoS One. 2016 Sep 8;11(9):e0162198. doi: 10.1371/journal.pone.0162198 (PMC5015869; doi:10.1371/journal.pone.0162198)
Supplement: S2 Appendix — (XLS) [file pone.0162198.s002.xls]

## Sheet: Key
Key
Q1	Journal Characteristics		Note		Note		Note		Notes		Notes		Notes		Notes		Notes		Notes		Notes		Notes		Notes
Q1A	Title	A systematic review on the effect of sweeteners on glycemic response and clinically relevant outcomes		Intense Sweeteners and the Control of Apppetite		Impact of water intake on energy intake and weight status: A systematic review		Can artificial sweeteners help control body weight and prevent obesity?		The Use of Low-Calorie Sweeteners by Adults: Impact on Weight Management		Intense sweeteners, energy intake and the control of body weight		Low-Energy Substitutes for Sugars and Fats in the Human Diet: Impact on Nutritional Regulation		Artificial Sweeteners: A systematic review of metabolic effects in youth		A review of the effectiveness of aspartame in helping with weight control		Intense sweeteners and energy density of foods: implications for weight control		Nonnutritive sweeteners: Current use and health perspectives - A scientific statement from the American Heart Association and the American Diabetes Association		Canadian Diabetes Association National Nutrition Committee Technical Review: Non-nutritive Intense Sweeteners in Diabetes Management		Nonnutritive sweetener consumption in humans: effects on appetite and food intake and their putative mechanisms		Diet beverages and the risk of obesity, diabetes, and cardiovascular disease: a review of the evidence		Artificially Sweetened Beverages—Do They Influence Cardiometabolic Risk?		Artificial sweeteners: a place in the field of functional foods? Focus on obesity and related metabolic disorders		Intense sweeteners, food intake, and the weight of a body of evidence		Effects of intense sweeteners on hunger, food intake, and body weight: a review		Benefits of saccharin: a review		Natural and synthetic intense sweeteners		Non-nutritive sweeteners: Review and update		Usefulness of artificial sweeteners for body weight control		Artificial Sweetener Use Among Children: Epidemiology, Recommendations, Metabolic Outcomes, and Future Directions		Effects of sugar intake on body weight: A review
Q1B	Month	11		1		9		6		/		2				8														11		6						2				12
Q1C	Year	2011		1995		2010		2005		2012		2007		1994		2010		2006		1999		2012		2004		2009		2013		2013		2012		1994		1991		1978		1991		2013		2003		2011		2003
Q1D	Journal Name	BMC Medicine		Nutrition Reviews		Nutrition Reviews		Nutrition Research Reviews		The Journal of Nutrition		European Journal of Clinical Nutrition		Neuroscience and Biobehavioral Reviews		International Journal of Pediatric Obesity		Nutrition Bulletin		European Journal of Clinical Nutrition		Diabetes Care		Canadian Journal of Diabetes		American Journal of Clinical Nutrition		Nutrition Reviews		Current Atherosclerosis Reports		Current opinion in clinical nutrition and metabolic care		Physiology and Behavior		The American Journal of Clinical Nutrition		Environmental Research		The Journal of Nutritional Biochemistry		Nutrition		Nutrition Reviews		Pediatric Clinics of North America		Obesity Reviews
Q1E	Supplement	2		2		2		2		1		2		2		2		2		2		2		2		2		2		2		2		2		2		2		2		2		2		2		2
1	Yes
2	No
Q1F	Peer Review Status	Yes		Yes		Yes		Yes	No revision date, but according to the journal website "All reviews are subject to peer review before publication"	No		Yes		Yes		Yes		Yes		Yes		Yes		Yes		Yes		Yes		No		No		No		Yes		Yes		Yes		Yes		Yes		Yes		Yes
Q1G	Journal Funding	2	Springer	1	ILSI	1	ILSI	2	Cambridge University Press	3	Journal of the American Society of Nutrition, here is the list of the sustaining partners (donated more than 10 $): http://www.nutrition.org/our-members/corporate-members/our-sustaining-members/ "Published in a supplement to The Journal of Nutrition. Presented at the conference Low-Calorie Sweeteners, Appetite and Weight Control: What the Science Tells Us, held in Washington, DC, April 7–8, 2011.…	2	Nature Publishing Group	2	Official Journal of International Behavioral Neuroscience Society. Pergamon Press (Elsevier)	2	World Obesity Federation, not-for-profit charitable body linking over 50 regional and national associations with over 10,000 professional members in scientific, medical and research organisations. Editor: Wiley	3	Nutrition Bulletin is a journal of the British Nutrition Foundation that is largerly funded by industry: http://www.nutrition.org.uk/aboutbnf/membership/sustaining-members http://nutrition.org.uk/attachments/440_BNF%20Annual%20Report%202009-10.pdf	2	Nature Publishing Group	3	American Diabetes Association that receives large support by food industry: http://www.diabetes.org/about-us/corporate-support/our-corporate-supporters.html	3	Canadian Diabetes Association that partners and is largely funded by food industry (PepsiCo…): http://www.diabetes.ca/about-cda/funding-accountability http://www.diabetes.ca/about-cda/donor-recognition-2013 http://www.weightymatters.ca/2012/11/guest-post-pharmacist-blasts-canadian.html http://www.weightymatters.ca/2014/01/canadian-diabetes-association-taps.html	3	American Society for Nutrition , here is the list of the sustaining partners (donated more than 10 $): http://www.nutrition.org/our-members/corporate-members/our-sustaining-members/	1	ILSI	2	Springer	2	Lippincott Williams & Wilkins	2	International Behavioral Neuroscience Society	3	American Society for Nutrition , here is the list of the sustaining partners (donated more than 10 $): http://www.nutrition.org/our-members/corporate-members/our-sustaining-members/	2	Elsevier	2	Elsevier	2	Elsevier	1	ILSI	2	Elsevier	2	World Obesity Federation, not-for-profit charitable body linking over 50 regional and national associations with over 10,000 professional members in scientific, medical and research organisations. Editor: Wiley
1	Food Industry
2	Non Food Industry
3	Mixed
Q2	Review Characteristics
Q2a	Name of Artificial Sweeteners(s)	Acesulfame-K, Aspartame, Cyclamat, Saccharin, Sucralose		Aspartame, Saccharin		Aspartame, Acesulfame K, Saccharin		Aspartame, Acesulfame K, Saccharin		low calorie sweeteners	Never mentioned in the text the word "aspartame" or" saccharin", althought present in the reference. Only once used the word "artificial sweetener"	Aspartame		Aspartame		Acesulfame-K; aspartame; neotame; saccharine; sucralose;		Aspartame		Aspartame		Acesulfame-K; aspartame; neotame; saccharine; sucralose;		aspartame, acesulfame-K, sucralose, saccharin, cyclamate, thaumatin		Acesulfame-K; aspartame; neotame; saccharine; sucralose;		acesulfame potassium, aspartame, saccharin, sucralose, and neotame		acesulfame potassium, aspartame, saccharin, sucralose, and neotame.		aspartame, acesulphame-K, saccharin, sucralose, and cyclamate		aspartame, cyclammate, saccharin		acesulfame k, aspartame, saccharin		saccharin		saccharin, cyclamate, aspartame, acesulfame k		saccharin, aspartame, acesulfame k, sucralose		aspartame, saccharin		saccharin, aspartame, acesulfame k, sucralose, neotame		aspartame, acesulfame K, cyclamate and saccharine
Q2b	Comparison Group (s)	sucrose		water, sucrose, glucose, fructose		water		sucrose, HFCS		/		sucrose		sucrose		sucrose; maltodestrin		sucrose; water		sucrose		sucrose		water, sugar		sugar, water		sugar, water		sugar, cow milk, water		sugar, cow milk, water		placebo, sucrose		sucrose; water		water, sucrose		/		/		sucrose, water		sucrose, water		sucrose, water
Q2c	Time period covered by the studies in the paper	1950-2011		/		/		/		/		/		/		no restriction		1977-2005		/		/		/		/		/		/		/		/		/		/		/		1987 to 2012		/		/		1980-2003
Q2d	Number of Studies included in the Sample	51 article,53 trials		/		11 (10 adults, 1 children)		/		/		/		/		18		16		/		/		/		/		/		/		/		/		/		/		/		/		/		/		35
Q2f	Meta-analysis	1		2		1		2		2		2		2		2		1		2		2		2		2		2		2		2		2		2		2		2		2		2		2		2
1	Yes
2	No
Q3	Outcome Assessment
Q3a	Name of Outcome(s)	weight change (absolute, BMI), energy intake, lipid measures (total cholesterol, triglycerides, high den- sity lipoprotein (HDL), low density lipoprotein (LDL)), HbA1C, insulin resistance (for example, Homeostatic Model Assessment (HOMA) index), and 2-hour blood glucose (with or without meals)		appetite, food intake, calor compensation at next meal, weight reduction		change in food energy intake at a single meal, Total energy intake (TEI) consumed, preload calories, weight loss		weight gain, BMI, obesity, glicemic index, food intake		weight loss, weight management, weight gain,BMI diet quality		body weight, BMI, weight gain		body weight, body composition, nutritional balance,		artificial sweetener consumption in association with metabolic health effects, such as food intake, weight change, diabetes, and metabolic syndrome components		effect of substituting sugar with either aspartame alone or aspartame in combination with other intense sweeteners on energy intake or bodyweight in adults		control of body weight		body weight, BMI		weight loss, weight management		weight management; BMI		body weight regulation, obesity		weight gain, weight loss, obesity		body weight, metabolic risk markers		weight control; body weight		appetite, hunger, food intake,body weight, weight gain, weight loss		weight control, weight loss, weight gain		insulin secretion, weight gain		weight control, glucose homeostasis		weight loss, weight gain, weight control		weight control, BMI, weight loss, weight gain		BMI, body weight, weight gain, weight loss
Q3b	Weight Outcome Assessment	4	4	2	weight reduction	2		4		4		5		2		4		5		7		4		4		4		4		4		4		7		7		2		2		2		4		4		4
1	BMI
2	other measure of weight gain
3	other measure of obesity
4	1,2,3
5	1,2
6	1,3
7	2,3
Q3c	Adverse Outcomes Assesment	1		/		/		1		/		/		/		1		/		/		1		1		/		3		3		3		1		/		3		1		1		/		1		1
1	Diabetes
2	Hipertension
3	1,2
Q4	Assesment of Risk of Bias (4 points)
Q4a	Inclusion/Exclusion Criteria	1		2		1		2		2		2		2		1		1		2		1		1		2		3		3		2		2		2		2		2		1		2		2		1
1	Yes
2	No
3	Unclear
Q4b	Selection of the studyes by two or more assessors	1	A standardized data extraction method was performed by a single reviewer. A second reviewer checked the extracted data for accuracy	2		2		2		2		2		2		1		2		2		2		2		2		2		2		2		2		2		2		2		2		2		2		2
1	Yes
2	No
3	Unclear
Q4c	Comprehensive Search Strategy	1		2		1		3		2		2		2		1		3		2		1		3		2		2		2		2		2		2		2		2		3		2		2		3
1	Yes
2	No
3	Unclear
Q4d	Methodological Discrepancies between the studies controlled and explored	1		3		1		3		2		3		1		1		1		3		1		3		1		3		3		3		3		2		3		3		3		2		1		3
1	Yes
2	No
3	Unclear
Q5	Results	3b, 3a unfavorable	neutral for healthy, favor for obese	DM-3b CEK-2b unclear	2 studies on obese population: one study favors, one study neutral	2a, 2c unfavorable		DM-3a,3b,3c CEK 1b unclear		DM 1a, 1b CEK 3a unclear		DM 3a, 3b CEK 1a, 2b unclear		DM 2a,3b CEK 2b unclear		2c unfavorable		1a favorable		DM 3a, 3b CEK 2b unclear		DM 3a, 3b CEK 3a, 2c, 2b unclear		DM 3a, 3b CEK 3a 2b unclear		3a, 3b unfavorable		3a, 3b, 3c unfavorable		3a, 3c unfavorable		DM 3a, 3b CEK 2a, 3c unclear		DM 3b, 3a CEK 1 unclear		DM 3a, 3b CEK 1a, 2a unclear		2b unfavorable		2a, 2b unfavorable		2a, 2c unfavorable		DM 3a, 3b CEK 1B,2a unclear		2c unfavorable		2a, 2b unfavorable
1	Positive (chose one or more)
1a	Healthy Adults
1b	Non-healthy Adults
1c	Children
2	Negative (chose one or more)
2a	Healthy Adults
2b	Non-healthy Adults
2c	Children
3	Mixed (chose one or more)
3a	Healthy Adults
3b	Non-healthy Adults
3c	Children
Q6	Conclusion	1	hypocaloric sweeteners could play an important role in a wider population health strategy to prevent, reduce and manage obesity-related comorbidities. Eliminating unnecessary added sweet- eners from food products (for example, buns, crackers, and processed meats) and substituting sugars with lower calorie sweeteners in foods such as desserts and drinks could significantly improve health.	1		2	Overall, this review suggests promising results for promoting water as a replacement beverag	2	"Possibly because of methodological problems there is no body of evidence to support the view that the longterm use of artificial sweeteners helps to prevent weight gain"." In surveys the use of artificial sweeteners tended to be associated with higher weight, although it is more likely that this is a response to, rather than a cause of, weight gain"	1	We conclude that there is no evidence that LCS can be claimed to be a cause of higher body weights in adults	1	diet beverages might represent the optimal use of intense sweeteners in the context of a weight control strategy	2	"energy compensation is easily possible, if not obligatory. In consequence, the use of energy-reduced foods will decrease energy intake only in the context of deliberate attempts at weight control"	2		1	This review has shown that using foods and drinks sweetened with aspartame instead of those sweetened with sucrose is an effective way to maintain and lose weight without losing the palatability of the diet.	1	Intense sweeteners offer a very effective method of reducing energy density of foods while maintaining their palatability	1	The evidence reviewed suggests that when used judiciously, NNS could facilitate reductions in added sugars intake, thereby resulting in decreased total energy and weight loss/weight control, and promoting beneficial effects on related metabolic parameters.	1		1		1		1	Indeed, experimental studies in humans suggest ASBmay be effective for weight loss when replacing sugar-sweetened beverages	1	Recent large population studies point toward decreased body weight and lower risk of type-2 diabetes and CHDs with increased intake of artificial sweeteners compared with sugar	1		1		2		2		2	Management of obesity is multifactorial, and no adequate evidence exists to target NNS use as an effective strategy in weight management	1	Subjects supplementing their diets with articially sweetened foods lost weight, whereas those consuming high-sucrose foods gained weight.	2	the authors cautiously conclude that there are no benefits of artificial sweetener use in young children	2
1	Favorable
2	Unfavorable
Q7	Study Funding
Q7a	Role of Funding Source	2		1		3	.	2		3		1		3		1		3		1		3		3		2		3		1		4		4		4		4		4		4		1		2		3
Role
1	Not disclosed
2	Sponsor not involved
3	Sponsor involved
4	Disclosed No sponsor
Q7b	List how sponsor was involved (if applicable)	Support for this work was provided in part through an Interdisciplinary Team Grant to the Interdisciplinary Chronic Disease Collaboration from the Alberta Heritage Foundation for Medical Research (AHFMR). AHFMR was not involved in the interpretation of results or the drafting of the manuscript.				Florence Constant (Nestle’s Water Research) for advice and references		The partial funding by the Sugar Bureau during the writing of the present review is gratefully acknowledged. The funding in no way restricted the topics discussed or the views expressed that are solely those of the author. The author has no financial interest in either natural or artificial sweeteners.		Supported by the Committee on Low-Calorie Sweeteners of the North American Branch of the International Life Sciences Institute. G. H. Anderson and J. Foreyt received a modest honorarium for their participation in the workshop and development of the manuscript. All authors received travel funding to attend the workshop.				The writing of this review was stimulated by a grant from the Eridania Beghin-Say Company (France).		This work was supported by the intramural research program of the National Institute of Diabetes, Digestive and Kidney Diseases.		The authors wish to thank the Ajinomoto Company for financial support.		/		This document was approved by the American Heart Association Science Advisory and Coordinating Committee on April 18, 2012, and by the American Diabetes Association Executive Committee on April 19, 2012.		The authors would like to acknowledge... the National Nutrition Committee of the CDA in reviewing the material and the evidence-based conclusions prior to submission for publication		Supported by PHS grant no. 1 R01 DK 063185 and the USDA HATCH grant 0172514/INDO0840-55 (to RM) and grants R01-HD39183, R01- HD041375, and R01 HD030880 (to BP).		This review was conducted for and supported by theHealthy Eating Research programof the RobertWood Johnson Foundation. The purpose of this document is to encourage future research and additional dialogue on the impact of diet sodas on obesity, diabetes, and cardiovascular disease.																		This work was supported, in part, by the Intramural Research Program of the National Institutes of Health, and the National Institute of Diabetes, Digestive, and Kidney Diseases.		A grant from ‘Suikerstichting Nederland’ (the Netherlands) for writing this article is gratefully acknowledged.
Q7c	Type of Funding Source	2		5		1C		1B		1A		5		1B		2		1A		5		3		3		2		3		5		5		5		2		5		5		5		5		2		1B
1	Food Indusrty (choose one or more options)
1A	AS Industry
1B	Glucose Industry
1C	Other Industry
2	Government
3	private non-profit
4	other
5	no funding
Q7d	List names of all funding sources (if applicable)	Interdisciplinary Team Grant to the Interdisciplinary Chronic Disease Collaboration from the Alberta Heritage Foundation for Medical Research (AHFMR)				Funding was provided by the Nestlé Waters, Issy-les-Moulineaux, France, and NIH R01-CA109831 and R01-CA121152.		Sugar Bureau		Committee on Low-Calorie Sweeteners of the North American Branch of the International Life Sciences Institut				Eridania Beghin-Say Company (France).		NIH intramural research program of the National Institute of Diabetes, Digestive and Kidney Diseases		Ajinomoto Company				American Diabetes Association, American Heart Association		Canadian Diabetes Association		NIH, USDA		Healthy Eating Research programof the RobertWood Johnson Foundation								Supported by NIDDK grants DK39177 and DK40968.										NIH		Suikerstichting Nederland	Sugar Industry: http://www.suikerinfo.nl/nl/forms/suikerstichtingnederland.php
Q8	Financial Conflict of Interest	1	Dr. Tonelli has received a peer reviewed Canadian Institutes of Health Research Industry Partnership Operating Grant, from Abbott Laboratories. Dr. Field is a scientific advisor to International Life Science Institute North America (non-financial arrangement)	2	Adam Drewnowski, PhD is Scientific Advisory Board of Nutrition Reviews, Board of Trustees ILSI, Nestle ( http://www.ncbi.nlm.nih.gov/pmc/articles/PMC3840570/ ), Ajinomoto ( http://jn.nutrition.org/content/early/2012/05/02/jn.111.149575?related-urls=yes&legid=nutrition;jn.111.149575v1 ), Corn Refiners Association and American Beverage Institute : http://www.cspinet.org/integrity/watch/200703121.ht…	2	DOI of BM Popkin: http://www.choicesprogramme.org/public/declarations-of-interest/popkindeclaration-of-interest-v2013.pdf	2	Although D Benton declares no conflict, writing of this review was funded by Sugar Bureau, and a later review on the same field was funded by World Sugar Research Organization: http://www.ncbi.nlm.nih.gov/pubmed/20056521	1	Author disclosures: G. H. Anderson has received consulting fees, honoraria, donations, and unrestricted grants from food, beverage, and pharmaceutical companies and from government and nonprofit entities. He is director of the University-Industry Program in Food Safety, Nutrition and Regulatory Affairs at the University of Toronto, which currently includes 14 private-sector members. He has publis…	2	Adam Drewnowski, PhD is Scientific Advisory Board of Nutrition Reviews, Board of Trustees ILSI, Nestle ( http://www.ncbi.nlm.nih.gov/pmc/articles/PMC3840570/ ), Ajinomoto ( http://jn.nutrition.org/content/early/2012/05/02/jn.111.149575?related-urls=yes&legid=nutrition;jn.111.149575v1 ), Corn Refiners Association and American Beverage Institute : http://www.cspinet.org/integrity/watch/200703121.ht…	1	The writing of this review was stimulated by a grant from the Eridania Beghin-Say Company (France). France Bellisle, M.D., Centre National de la Recherche Scientifique and Institut National de la Santé et de la Recherche Médicale. Head of Human Nutrition Research at Hotel-Dieu Hospital. Paris, France. Co-author for study titled “Liquid calories, sugar, and body weight” supported by the American B…	4		1	Margaret Ashwell, Ph.D. Head of Ashwell Associates that includes among its clients: The Kelloggs Company, Danone Group, Unilever Marks and Spencer, GlaxoSmithKline, National Starch Ajinomoto, PepsiCo, Disney plc, Meat and Livestock Commission, Cambridge Weight Plan, The Coca-Cola Company, Pure Circle Ltd, The Jordans & Ryvita Company Ltd., The Yoghurt Council http://www.ashwell.uk.com/client.htm …	2	Adam Drewnowski, PhD is Scientific Advisory Board of Nutrition Reviews, Board of Trustees ILSI, Nestle ( http://www.ncbi.nlm.nih.gov/pmc/articles/PMC3840570/ ), Ajinomoto ( http://jn.nutrition.org/content/early/2012/05/02/jn.111.149575?related-urls=yes&legid=nutrition;jn.111.149575v1 ), Corn Refiners Association and American Beverage Institute : http://www.cspinet.org/integrity/watch/200703121.ht…	1	J Wylie-Rosett, grant recipient Kraft (more than 10,000 $). Rachel K. Johnson, grant and consultancy/advisory board Dairy Management Inc	3		2	DOI of BM Popkin: http://www.choicesprogramme.org/public/declarations-of-interest/popkindeclaration-of-interest-v2013.pdf R D. Mattes, received funding from Eli Lilly, Abbott Laboratories, SlimFast Foods, Kellogg Co., Kraft Foods and the Dairy Council. (JAMA. 2009;301:318-20.)	2	Mark A. Pereira, Ph.D., Assistant Professor of Epidemiology, School of Public Health, University of Minnesota, Minneapolis. Formerly Assistant Professor of Pediatrics, Harvard Medical School, Boston. Research on dairy consumption, obesity, and the insulin resistance syndrome in young adults supported in part by General Mills, Inc. (J. Am. Med. Assoc. 2002;287:2081-89). Grants by General Mills, Ra…	2	Mark A. Pereira, Ph.D., Assistant Professor of Epidemiology, School of Public Health, University of Minnesota, Minneapolis. Formerly Assistant Professor of Pediatrics, Harvard Medical School, Boston. Research on dairy consumption, obesity, and the insulin resistance syndrome in young adults supported in part by General Mills, Inc. (J. Am. Med. Assoc. 2002;287:2081-89). Grants by General Mills, Ra…	2	A Raben funded by Danisco and Coca-Cola: http://ajcn.nutrition.org/content/100/1/36.long	2	Renwick DOI (International Sweeteners Association, Coca Cola, Ajinomoto…) : http://www.pesticides.gov.uk/guidance/industries/pesticides/advisory-groups/PRiF/PRC-Pesticides-Residues-Commitee/About_the_PRC/declaration-of-interests	2	Barbara J. Rolls, Ph.D., Johns Hopkins University School of Medicine (1992); Professor of Nutrition, Penn State University. Consultant for Knoll Pharmaceuticals and has received research support from, among others, Knoll, P&G, and ILSI. Coauthored (with James O. Hill) a 1998 report for ILSI on “Carbohydrates and Weight Management.” (phone conversation w/ R. Collins, CSPI, December 6, 2000) (Newar…	3		3		3		2	Marie-Pierre St-Onge, Ph.D., Research Associate, St. Luke’s/Roosevelt Hospital, New York City. Formerly with New York Obesity Research Center, Columbia University and the Department of Nutrition Sciences, University of Alabama, Birmingham. Study titled "Weight-loss diet that includes consumption of medium-chain triacylglycerol oil leads to a greater rate of weight and fat mass loss than does oliv…	4		1	All the authors are affiliated with TNO, which is a CRO that collaboartes also with ILSI
1	Yes (disclosed in the paper)
2	Yes (not disclosed in the paper)
3	No disclosure statement
4	No
Q9	Authors
Q9a	Number of Conflicted Authors	2		1		1		1		4	Although Sigmant Grant declares no conflict of interest, travel expenses were paid by ILSI for her too (disclosed in the paper)	2		2		/		3		1		2		?		2		1		2		1		1		1		/		/		/		2		/		4
Q9b	Total Number of Authors	6		1		2		1		4		2		2		3		3		1		7		4		2		1		2		2		1		1		1		2		3		2		3		4
Q9c	Non Conflicted Authors Name	N Wiebe, R Padwal, S Marks, R Jacobs				MC Daniels		/		/		/		/		R J Brown, M A De Banate, K I Rother		/		/		C Gardner, S. Gidding, L M Steffen, D Reader and A H Lichtenstein		Réjeanne Gougeon, Mark Spidel, Kristy Lee, Catherine J. Field		/		/				B Richelsen				/		K Rosenman		V M Sardesai, T H Waldshan		P Shankar, S Ahuja, K Sriram		/		A Sylvetsky, KI Rother, R Brown
Q9d	Conflicted Authors Name	M Tonelli, C. Field		A Drewnowski		BM Popkin		D Benton		GH Anderson, J Foreyt, M Sigman-Grant. DB Allison		F Bellisle, A Drewnowski		F Bellisle, C Perez		/		A. de la Hunty, S. Gibson, M. Ashwell		A Drewnowski		Rachel K. Johnson, J Wylie-Rosett				RD Mattes, BM Popkin		MA Pereira		MA Pereira, AO Odegaard		A Raben		AG Renwick		BJ Rolls		/		/		/		MP St-Onge, S Heymsfield		/		SHF Vermunt, WJ Pasman, G Schaafsma, A F M Kardinaal
Q10	Concordance
Q10a	Concordance Results and Conclusion	4		/		2		/		/		/		/		2		1		/		/		/		4		4		4		/		/		/		2		2		2		/		2		2
1	Concordant-R and C favor
2	Concordant - R and C do not favor
3	Discordant - R favor, C do not favor
4	Discordant - R do not favor, C favor
[truncated: 14 more columns]

## Sheet: Results
Article #	Name of Outcome	Outcome Category	Result and variance (eg, mean, SD, percent, CI)	Statistical test (result of test and test name)	Favors Artificially Sweetened Beverage/Does not favor Artificially Sweetened Beverage	Final Result	Comments
